# Supplementary material
Source: publisher figshare collection journal article supplement (https://acs.figshare.com/ndownloader/files/4544956)
Supplement: Supplementary file 1 [file 4544956]

# Supporting Information

## Probing the Surface Glass Transition Temperature of Polymer Films via Organic Semiconductor Growth Mode, Microstructure, and Thin-Film Transistor Response.

*Choongik Kim, Antonio Facchetti,\* Tobin J. Marks\**

Department of Chemistry and the Materials Research Center, Northwestern University, 2145  
Sheridan Road, Evanston, Illinois, 60208

**Correspondence** and requests for materials should be addressed to A.F. (a-facchetti@northwestern.edu) or T.J.M (t-marks@northwestern.edu).

## Experimental Section

**Reagents and Materials.** Pentacene (**P5**, Aldrich) was used after purification by multiple gradient vacuum sublimation, while  $\alpha$ -sexithiophene ( **$\alpha$ -6T**, Aldrich) was used as received. The semiconductors  $\alpha,\omega$ -diperfluorohexylcarbonylquarterthiophene (**DFHCO-4T**),<sup>1</sup>  $\alpha,\omega$ -diperfluorohexylquarterthiophene (**DFH-4T**),<sup>2</sup> 5,5'-bis(4-n-perfluorooctylphynyl)-2,2'-bithiophene (**DFO-PTTP**),<sup>3</sup> and N,N'-bis(n-octyl)-1,7- and N,N'-bis(n-octyl)-1,6-dicyanoperylene-3,4:9,10-bis-(dicarboximide) (**PDI-8CN<sub>2</sub>**)<sup>4</sup> were available in our laboratory. Polystyrene (PS1,  $M_n = 280$  kg/mol; PS2,  $M_n = 13$  kg/mol; PS3,  $M_n = 4$  kg/mol), poly(4-methylstyrene) (PMS,  $M_n = 72$  kg/mol), poly(methyl methacrylate) (PMMA1,  $M_n = 15$  kg/mol; PMMA2,  $M_n = 45$  kg/mol), poly(t-butylstyrene) (PTBS,  $M_n = 32$  kg/mol), and poly(4-vinylphenol) (PVP,  $M_n = 20$  kg/mol) were purchased from Aldrich and used without further purification. Poly(2-vinylpyridine) (P2VP,  $M_v = 200$  kg/mol) was purchased from Scientific Polymer Products and was used after drying the as-received material in a vacuum oven at  $\sim 110$  °C to remove residual monomer. Dioctylphthalate (DOP) (99%, Aldrich) was used as received. Heavily doped p-type Si wafers with a 300 nm thick thermally grown SiO<sub>2</sub> layer (p<sup>+</sup>-Si/SiO<sub>2</sub>) or n-type Si wafers with native oxide (n<sup>+</sup>-Si) (Montco Silicon Tech) were used as device substrates. The calorimetric bulk  $T_g$  values for the present dielectric polymers were determined by differential scanning calorimetry (DSC; Mettler Toledo DSC822e, second heat, onset method, 10 K min<sup>-1</sup>).

**Polymer Film Fabrication and Characterization.** Pentacene-based TFTs were fabricated on heavily doped p-type Si wafers with a 300 nm thick thermally grown SiO<sub>2</sub> layer (PS1, 70 mg/mL, was also fabricated on heavily doped n-type Si wafers with a native oxide layer). All substrates were cleaned by sonication in ethanol (200 proof) for 3 min, followed by oxygen plasma treatment for 5 min (20W, 0.5 Torr). PS1 (5, 20, 30, 50, 70 mg/mL in

anhydrous toluene), PS2 (10, 30 mg/mL in anhydrous toluene), PS3 (5, 20 mg/mL in anhydrous toluene), PMS (5 mg/mL in anhydrous toluene), PVA (30 mg/mL in millipore water), P2VP (3, 5, 20 mg/mL in 1,1,2-trichloroethane), PMMA1 (5, 10, 40 mg/mL in anhydrous toluene), PMMA2 (20 mg/mL in anhydrous toluene), PTBS (10 mg/mL in anhydrous toluene), PVP (20 mg/mL in anhydrous THF), and DOP-doped (4 wt%) PS1 (6, 25 mg/mL in anhydrous toluene) were all spin-coated onto the substrates at 2000–5000 rpm in air, and the resulting films dried in a vacuum oven at 80 – 90 °C overnight.<sup>5</sup> Bilayer polymer films (PS1/P2VP) on 300 nm SiO<sub>2</sub> substrates with top layers of PS1 (5 mg/mL in anhydrous toluene) were spin-coated directly onto the P2VP (5, 20, 40 mg/mL in 1,1,2-trichloroethane) films, since toluene is a nonsolvent for P2VP.<sup>39</sup> Oxygen plasma-treated polymer films (PS1/2- and PVP-OXY) were prepared by exposure to an O<sub>2</sub>-plasma for 10 s. The present polymer films afford very smooth morphologies with root-mean-square (RMS) roughnesses of ~ 0.3 nm except in the case of bilayer polymer films where the RMS roughness is ~ 0.5 nm, as characterized by tapping-mode AFM using a Si cantilever. All film thicknesses were measured by profilometer (Tencor, P10).

**Device Fabrication and Characterization.** The organic semiconductors were vacuum-deposited at  $\sim 5 \times 10^{-6}$  Torr (500 Å,  $\sim 0.5$  Å/s for pentacene,  $\sim 0.3$  Å/s for the other semiconductors) at preset deposition temperatures ( $T_D$ ) of 25 – 90 °C. For post-annealing experiments, pentacene films were deposited on the various polymer gate dielectrics at 25 °C and were annealed on a hot plate under nitrogen at various annealing temperatures ( $T_A$ ). Thin films of pentacene were analyzed by X-ray diffraction ( $\theta/2\theta$  and  $\omega$  scan) in a slit-configuration using Ni-filtered Cu K $\alpha$  radiation (Rigaku ATXG) and by AFM (JEOL-5200 Scanning Probe Microscope) in the tapping mode. For OTFT/MIS (metal-insulator-semiconductor) device fabrication, top-contact electrodes ( $\sim 50$  nm) were deposited by evaporating gold ( $< 1 \times 10^{-6}$

Torr) through a shadow mask with channel length (L) and width (W) defined as 100  $\mu\text{m}$  and 5000  $\mu\text{m}$ , respectively.

**Electrical Measurements.** The capacitances of the present dielectric films were measured on MIS structures using a Signaton probe station equipped with a digital capacitance meter (Model 3000, GLK Instruments) and an HP4192A impedance analyzer (Figure S12). All OTFT measurements were carried out under vacuum ( $1 \times 10^{-5}$  Torr) using a Keithly 6430 subfemtoammeter and a Keithly 2400 source meter, operated by a local Labview program with GPIB communication. Mobilities ( $\mu$ ) were calculated in the saturation regime using the standard relationship:  $\mu_{\text{sat}} = (2I_{\text{DS}}L)/[WC_i(V_G - V_T)^2]$ , where  $I_{\text{DS}}$  is the source-drain saturation current,  $C_i$  is the gate dielectric capacitance (per area),  $V_G$  is the gate voltage, and  $V_T$  is the threshold voltage. The latter can be estimated as the x intercept of the linear section of the plot of  $V_G$  vs.  $(I_{\text{DS}})^{1/2}$ .<sup>6</sup>

- (1) Yoon, M.-H.; Dibenedetto, S. A.; Facchetti, A.; Marks, T. J. *J. Am. Chem. Soc.* **2005**, *127*, 1348-1349.
- (2) Facchetti, A.; Mushrush, M.; Yoon, M.-H.; Hutchison, G. R.; Ratner, M. A.; Marks, T. J. *J. Am. Chem. Soc.* **2004**, *126*, 13859-13874.
- (3) Facchetti, A.; Letizia, J.; Yoon, M.-H.; Mushrush, M.; Katz, H. E.; Marks, T. J. *Chem. Mater.* **2004**, *16*, 4715-4727.
- (4) Jones, B. A.; Ahrens, M. J.; Yoon, M.-H.; Facchetti, A.; Marks, T. J.; Wasielewski, M. R. *Angew. Chem. Int. Ed.* **2004**, *43*, 6363-6366.
- (5) Kim, C.; Facchetti, A.; Marks, T. J. *Adv. Mater.* **2007**, *19*, 2561-2566.
- (6) Sze, S. M. *Semiconductor Devices: Physics and Technology* **1981**, 2nd edition; Wiley: New York.

**Table S1.** Field-Effect Mobility ( $\mu_{sat}$ ,  $\text{cm}^2/\text{V}\cdot\text{s}$ )<sup>a</sup>, Current On/Off Ratio ( $I_{on}:I_{off}$ ), Threshold Voltage ( $V_T$ , V) data for Pentacene TFTs fabricated on the Indicated Bilayer Gate Dielectrics and on c-SiO<sub>2</sub> as a Function of Pentacene Film Deposition Temperature ( $T_D$ ).

| Gate Diel.         | $T_g^b$ (°C)     | $d$ (nm)             | $T_D$ (°C)         |                    |                    |                    |                    |                    |                    |                    |                    |                    |                    |    |                    |
|--------------------|------------------|----------------------|--------------------|--------------------|--------------------|--------------------|--------------------|--------------------|--------------------|--------------------|--------------------|--------------------|--------------------|----|--------------------|
|                    |                  |                      | 25                 | 35                 | 40                 | 45                 | 50                 | 55                 | 60                 | 65                 | 70                 | 75                 | 80                 | 85 | 90                 |
| c-SiO <sub>2</sub> | 1175             | $\mu$                | 0.23               |                    |                    |                    | 0.20               |                    | 0.18               |                    | 0.20               |                    | 0.18               |    | 0.24               |
|                    |                  | ( $I_{on}:I_{off}$ ) | (10 <sup>8</sup> ) |                    |                    |                    | (10 <sup>8</sup> ) |                    | (10 <sup>8</sup> ) |                    | (10 <sup>7</sup> ) |                    | (10 <sup>8</sup> ) |    | (10 <sup>6</sup> ) |
|                    |                  | $V_T$                | -22                |                    |                    |                    | -22                |                    | -24                |                    | -23                |                    | -25                |    | -14                |
| PS1                | 103              | $\mu$                | 0.65               |                    |                    |                    | 0.68               | 0.66               | 0.42               | 0.05               | 0.05               | 0.02               | 0.01               |    |                    |
|                    |                  | ( $I_{on}:I_{off}$ ) | (10 <sup>6</sup> ) |                    |                    |                    | (10 <sup>5</sup> ) | (10 <sup>6</sup> ) | (10 <sup>6</sup> ) | (10 <sup>5</sup> ) | (10 <sup>6</sup> ) | (10 <sup>7</sup> ) | (10 <sup>6</sup> ) |    |                    |
|                    |                  | $V_T$                | -17                |                    |                    |                    | -22                | -14                | -23                | -30                | -21                | -27                | -24                |    |                    |
|                    |                  | $\mu$                |                    |                    |                    |                    | 0.65               | 0.59               | 0.40               | 0.10               | 0.05               |                    |                    |    |                    |
|                    |                  | ( $I_{on}:I_{off}$ ) |                    |                    |                    |                    | (10 <sup>6</sup> ) | (10 <sup>6</sup> ) | (10 <sup>5</sup> ) | (10 <sup>6</sup> ) | (10 <sup>6</sup> ) |                    |                    |    |                    |
|                    |                  | $V_T$                |                    |                    |                    |                    | -38                | -42                | -40                | -43                | -42                |                    |                    |    |                    |
|                    | 800 <sup>c</sup> | $\mu$                |                    |                    |                    |                    | 0.67               | 0.59               | 0.44               | 0.10               | 0.06               |                    |                    |    |                    |
|                    |                  | ( $I_{on}:I_{off}$ ) |                    |                    |                    |                    | (10 <sup>6</sup> ) | (10 <sup>6</sup> ) | (10 <sup>6</sup> ) | (10 <sup>7</sup> ) | (10 <sup>5</sup> ) |                    |                    |    |                    |
|                    |                  | $V_T$                |                    |                    |                    |                    | -66                | -66                | -61                | -78                | -80                |                    |                    |    |                    |
|                    |                  | $\mu$                |                    |                    |                    |                    | 0.68               | 0.57               | 0.38               | 0.10               | 0.08               |                    |                    |    |                    |
|                    |                  | ( $I_{on}:I_{off}$ ) |                    |                    |                    |                    | (10 <sup>6</sup> ) | (10 <sup>7</sup> ) | (10 <sup>6</sup> ) | (10 <sup>6</sup> ) | (10 <sup>6</sup> ) |                    |                    |    |                    |
|                    |                  | $V_T$                |                    |                    |                    |                    | -81                | -77                | -86                | -89                | -81                |                    |                    |    |                    |
| PS1-OXY            | 103              | $\mu$                |                    |                    |                    |                    |                    |                    |                    |                    | 0.17               |                    |                    |    |                    |
|                    |                  | ( $I_{on}:I_{off}$ ) |                    |                    |                    |                    |                    |                    |                    |                    | (10 <sup>4</sup> ) |                    |                    |    |                    |
| PS2                | 94               | $V_T$                |                    |                    |                    |                    |                    |                    |                    |                    | -23                |                    |                    |    |                    |
|                    |                  | $\mu$                | 0.54               |                    | 0.47               | 0.45               | 0.34               | 0.04               | 0.05               | 0.007              | 0.004              |                    |                    |    |                    |
|                    |                  | ( $I_{on}:I_{off}$ ) | (10 <sup>4</sup> ) |                    | (10 <sup>5</sup> ) | (10 <sup>5</sup> ) | (10 <sup>4</sup> ) | (10 <sup>7</sup> ) | (10 <sup>5</sup> ) | (10 <sup>6</sup> ) | (10 <sup>7</sup> ) |                    |                    |    |                    |
| PS2-OXY            | 94               | $V_T$                | -18                |                    | -22                | -24                | -16                | -17                | -22                | -22                | -36                |                    |                    |    |                    |
|                    |                  | $\mu$                |                    |                    |                    |                    |                    |                    |                    |                    | 0.16               |                    |                    |    |                    |
|                    |                  | ( $I_{on}:I_{off}$ ) |                    |                    |                    |                    |                    |                    |                    |                    | (10 <sup>4</sup> ) |                    |                    |    |                    |
| PS3                | 83               | $V_T$                |                    |                    |                    |                    |                    |                    |                    |                    | -21                |                    |                    |    |                    |
|                    |                  | $\mu$                | 0.32               | 0.18               | 0.08               | 0.006              | 0.004              | 0.006              | $5 \times 10^{-7}$ |                    |                    |                    |                    |    |                    |
|                    |                  | ( $I_{on}:I_{off}$ ) | (10 <sup>6</sup> ) | (10 <sup>5</sup> ) | (10 <sup>5</sup> ) | (10 <sup>7</sup> ) | (10 <sup>6</sup> ) | (10 <sup>7</sup> ) | (10 <sup>3</sup> ) |                    |                    |                    |                    |    |                    |
|                    |                  | $V_T$                | -28                | -16                | -18                | -32                | -33                | -32                | -44                |                    |                    |                    |                    |    |                    |
|                    |                  | $\mu$                | 0.34               | 0.17               | 0.20               | 0.02               | 0.04               | 0.005              | 0.003              |                    |                    |                    |                    |    |                    |
|                    |                  | ( $I_{on}:I_{off}$ ) | (10 <sup>6</sup> ) | (10 <sup>5</sup> ) | (10 <sup>5</sup> ) | (10 <sup>4</sup> ) | (10 <sup>7</sup> ) | (10 <sup>5</sup> ) | (10 <sup>6</sup> ) |                    |                    |                    |                    |    |                    |
|                    |                  | $V_T$                | -25                | -28                | -29                | -28                | -27                | -36                | -37                |                    |                    |                    |                    |    |                    |

<sup>a</sup> Carrier mobilities calculated in saturation within the charge carrier concentration range of  $3 - 4 \times 10^{12} \text{ cm}^{-2}$ . Standard deviations are typically < 10%; otherwise a mobility range is given. <sup>b</sup> From DSC data. <sup>c</sup> These films fabricated directly on Si substrates without a thermal oxide coating.

**Table S1.** Field-Effect Mobility ( $\mu_{sat}$ , cm<sup>2</sup>/V·s)<sup>a</sup>, Current On/Off Ratio ( $I_{on}:I_{off}$ ), Threshold Voltage ( $V_T$ , V) data for Pentacene TFTs fabricated on the Indicated Bilayer Gate Dielectrics and on c-SiO<sub>2</sub> as a Function of Pentacene Film Deposition Temperature ( $T_D$ ).

| Gate Diel. | $T_g^b$ (°C) | $d$ (nm) | $T_D$ (°C)           |                    |    |                    |                    |                    |                    |                    |                    |                    |                    |
|------------|--------------|----------|----------------------|--------------------|----|--------------------|--------------------|--------------------|--------------------|--------------------|--------------------|--------------------|--------------------|
|            |              |          | 25                   | 45                 | 50 | 55                 | 60                 | 65                 | 70                 | 75                 | 80                 | 85                 | 90                 |
| PVP        | 171          | 100      | $\mu$                |                    |    |                    |                    |                    | 0.34               |                    |                    |                    |                    |
|            |              |          | ( $I_{on}:I_{off}$ ) |                    |    |                    |                    |                    | (10 <sup>7</sup> ) |                    |                    |                    |                    |
|            |              |          | $V_T$                |                    |    |                    |                    |                    | -20                |                    |                    |                    |                    |
| PVP-OXY    | 171          | 100      | $\mu$                |                    |    |                    |                    |                    | 0.15               |                    |                    |                    |                    |
|            |              |          | ( $I_{on}:I_{off}$ ) |                    |    |                    |                    |                    | (10 <sup>4</sup> ) |                    |                    |                    |                    |
|            |              |          | $V_T$                |                    |    |                    |                    |                    | -14                |                    |                    |                    |                    |
| PMMA       | 86           | 10       | $\mu$                | 0.15               |    | 0.14               | 0.14               | 0.16               | 0.16               | 0.15               | 0.12               | 0.008              | 0.001              |
|            |              |          | ( $I_{on}:I_{off}$ ) | (10 <sup>3</sup> ) |    | (10 <sup>5</sup> ) | (10 <sup>4</sup> ) | (10 <sup>6</sup> ) | (10 <sup>6</sup> ) |
|            |              |          | $V_T$                | -9                 |    | -19                | -21                | -19                | -16                | -15                | -13                | -19                | -25                |
|            |              | 20       | $\mu$                | 0.18               |    | 0.14               | 0.14               | 0.14               | 0.17               | 0.16               | 0.16               | 0.06               | 0.005              |
|            |              |          | ( $I_{on}:I_{off}$ ) | (10 <sup>4</sup> ) |    | (10 <sup>5</sup> ) | (10 <sup>4</sup> ) | (10 <sup>7</sup> ) |
|            |              |          | $V_T$                | -11                |    | -22                | -21                | -24                | -19                | -16                | -14                | -18                | -26                |
|            |              | 100      | $\mu$                | 0.17               |    | 0.15               | 0.15               | 0.15               | 0.16               | 0.17               | 0.10               | 0.008              | 0.004              |
|            |              |          | ( $I_{on}:I_{off}$ ) | (10 <sup>4</sup> ) |    | (10 <sup>5</sup> ) | (10 <sup>4</sup> ) | (10 <sup>5</sup> ) | (10 <sup>6</sup> ) |
|            |              |          | $V_T$                | -25                |    | -25                | -24                | -29                | -24                | -31                | -24                | -28                | -23                |
| PMS        | 107          | 20       | $\mu$                | 0.73               |    | 0.63               | 0.65               | 0.58               | 0.56               | 0.25               | 0.15               | 3x10 <sup>-5</sup> |                    |
|            |              |          | ( $I_{on}:I_{off}$ ) | (10 <sup>5</sup> ) |    | (10 <sup>6</sup> ) | (10 <sup>5</sup> ) | (10 <sup>4</sup> ) |                    |
|            |              |          | $V_T$                | -18                |    | -20                | -30                | -31                | -30                | -24                | -26                | -23                |                    |
| PTBS       | 137          | 30       | $\mu$                | 0.59               |    |                    |                    |                    | 0.63               | 0.49               | 0.07               | 0.001              | 0.04               |
|            |              |          | ( $I_{on}:I_{off}$ ) | (10 <sup>4</sup> ) |    |                    |                    |                    | (10 <sup>6</sup> ) | (10 <sup>5</sup> ) | (10 <sup>8</sup> ) | (10 <sup>7</sup> ) | (10 <sup>8</sup> ) |
|            |              |          | $V_T$                | -7                 |    |                    |                    |                    | -24                | -9                 | -27 / -19          | -34 / -24          | -22 / -15          |
| P2VP       | 103          | 8        | $\mu$                | 0.08               |    | 0.09               | 0.08               | 0.08               | 0.02               | 0.02               | 5x10 <sup>-4</sup> | 4x10 <sup>-6</sup> |                    |
|            |              |          | ( $I_{on}:I_{off}$ ) | (10 <sup>5</sup> ) |    | (10 <sup>5</sup> ) | (10 <sup>3</sup> ) | (10 <sup>1</sup> ) |                    |
|            |              |          | $V_T$                | -21                |    | -26                | -27                | -26                | -25                | -21                | -28                | -25                |                    |
|            |              | 12       | $\mu$                | 0.07               |    | 0.07               | 0.08               | 0.06               | 0.01               | 0.01               | 5x10 <sup>-4</sup> | 2x10 <sup>-6</sup> |                    |
|            |              |          | ( $I_{on}:I_{off}$ ) | (10 <sup>5</sup> ) |    | (10 <sup>5</sup> ) | (10 <sup>3</sup> ) | (10 <sup>1</sup> ) |                    |
|            |              |          | $V_T$                | -21                |    | -25                | -25                | -23                | -21                | -20                | -25                | -15                |                    |
|            |              | 70       | $\mu$                | 0.08               |    | 0.07               | 0.09               | 0.08               | 0.02               | 0.02               | 1x10 <sup>-3</sup> | 1x10 <sup>-7</sup> |                    |
|            |              |          | ( $I_{on}:I_{off}$ ) | (10 <sup>5</sup> ) |    | (10 <sup>5</sup> ) | (10 <sup>5</sup> ) | (10 <sup>5</sup> ) | (10 <sup>4</sup> ) | (10 <sup>4</sup> ) | (10 <sup>6</sup> ) | (10 <sup>1</sup> ) |                    |
|            |              |          | $V_T$                | -30                |    | -31                | -29                | -29                | -25                | -22                | -21                | -51                |                    |

<sup>a</sup> Carrier mobilities calculated in saturation within the charge carrier concentration range of 3 – 4 × 10<sup>12</sup> cm<sup>-2</sup>. Standard deviations are typically < 10%; otherwise a mobility range is given. <sup>b</sup> From DSC data.

**Table S2.** Field-Effect Mobility ( $\mu_{sat}$ , cm<sup>2</sup>/V·s)<sup>a</sup>, Current On/Off Ratio ( $I_{on}:I_{off}$ ), Threshold Voltage ( $V_T$ , V) data for Pentacene TFTs fabricated on the Indicated Multilayer and DOP-doped Polymer Gate Dielectrics and on c-SiO<sub>2</sub> as a Function of Pentacene Film Deposition Temperature ( $T_D$ ).

| Gate Diel.            | $T_g^b$ (°C) | $d$ (nm) |                      | $T_D$ (°C)         |                    |                    |                    |                    |                    |                    |                    |
|-----------------------|--------------|----------|----------------------|--------------------|--------------------|--------------------|--------------------|--------------------|--------------------|--------------------|--------------------|
|                       |              |          |                      | 25                 | 45                 | 50                 | 55                 | 60                 | 65                 | 70                 | 75                 |
| PS1 /P2VP             | 103          | 12/12    | $\mu$                | 0.52               | 0.59               | 0.47               | 0.34               | 0.20               | 0.04               | 0.002              | 0.006              |
|                       |              |          | ( $I_{on}:I_{off}$ ) | (10 <sup>6</sup> ) | (10 <sup>6</sup> ) | (10 <sup>5</sup> ) | (10 <sup>5</sup> ) | (10 <sup>5</sup> ) | (10 <sup>6</sup> ) | (10 <sup>6</sup> ) | (10 <sup>6</sup> ) |
|                       |              |          | $V_T$                | -26                | -27                | -26                | -26                | -27                | -31                | -34                | -44                |
|                       |              | 12/65    | $\mu$                | 0.56               | 0.45               | 0.40               | 0.39               | 0.19               | 0.03               | 0.004              | 0.006              |
|                       |              |          | ( $I_{on}:I_{off}$ ) | (10 <sup>6</sup> ) | (10 <sup>5</sup> ) | (10 <sup>5</sup> ) | (10 <sup>5</sup> ) | (10 <sup>5</sup> ) | (10 <sup>6</sup> ) | (10 <sup>7</sup> ) | (10 <sup>7</sup> ) |
|                       |              |          | $V_T$                | -27                | -25                | -26                | -26                | -27                | -24                | -33                | -31                |
|                       |              | 12/205   | $\mu$                | 0.44               | 0.39               | 0.32               | 0.31               | 0.18               | 0.03               | 0.004              | 0.0002             |
|                       |              |          | ( $I_{on}:I_{off}$ ) | (10 <sup>6</sup> ) | (10 <sup>6</sup> ) | (10 <sup>5</sup> ) | (10 <sup>5</sup> ) | (10 <sup>5</sup> ) | (10 <sup>6</sup> ) | (10 <sup>6</sup> ) | (10 <sup>6</sup> ) |
|                       |              |          | $V_T$                | -34                | -34                | -36                | -36                | -34                | -34                | -49                | -52                |
| DOP (4 wt%)-doped PS1 | 103          | 18       | $\mu$                | 0.41               | 0.63               | 0.69               | 0.50               | 0.42               | 0.07               | 0.03               | 3x10 <sup>-4</sup> |
|                       |              |          | ( $I_{on}:I_{off}$ ) | (10 <sup>7</sup> ) | (10 <sup>6</sup> ) | (10 <sup>5</sup> ) | (10 <sup>5</sup> ) | (10 <sup>5</sup> ) | (10 <sup>7</sup> ) | (10 <sup>7</sup> ) | (10 <sup>6</sup> ) |
|                       |              |          | $V_T$                | -23                | -26                | -26                | -17                | -24                | -20                | -27                | -44                |
|                       |              | 80       | $\mu$                | 0.33               | 0.47               | 0.47               | 0.40               | 0.35               | 0.09               | 0.07               | 0.004              |
|                       |              |          | ( $I_{on}:I_{off}$ ) | (10 <sup>6</sup> ) | (10 <sup>5</sup> ) | (10 <sup>6</sup> ) | (10 <sup>5</sup> ) | (10 <sup>5</sup> ) | (10 <sup>5</sup> ) | (10 <sup>5</sup> ) | (10 <sup>4</sup> ) |
|                       |              |          | $V_T$                | -28                | -32                | -32                | -35                | -32                | -29                | -28                | -29                |

<sup>a</sup> Carrier mobilities calculated in saturation within the charge carrier concentration range of 3 – 4 × 10<sup>12</sup> cm<sup>-2</sup>. Standard deviations are typically < 10%; otherwise a mobility range is given. <sup>b</sup> From DSC data.

**Table S3.** Field-Effect Mobility ( $\mu_{sat}$ , cm<sup>2</sup>/V·s)<sup>a</sup>, Current On/Off Ratio ( $I_{on}:I_{off}$ ), Threshold Voltage ( $V_T$ , V) data for Post-annealed Pentacene TFTs Fabricated on the Indicated Gate Dielectrics and on c-SiO<sub>2</sub> as a Function of Annealing Temperature ( $T_A$ ).

| Gate Diel.         | $T_g^b$ (°C) | $d$ (nm)           | $T_A$ (°C)         |                    |                    |                    |                    |                    |                    |        |
|--------------------|--------------|--------------------|--------------------|--------------------|--------------------|--------------------|--------------------|--------------------|--------------------|--------|
|                    |              |                    | 25                 | 70                 | 90                 | 100                | 110                | 130                | 160                |        |
| c-SiO <sub>2</sub> | 1175         | $\mu$              | 0.39               | 0.41               | 0.41               | 0.24               | 0.23               | 0.04               | 0.009              |        |
|                    |              | $(I_{on}:I_{off})$ | (10 <sup>6</sup> ) | (10 <sup>5</sup> ) | (10 <sup>5</sup> ) | (10 <sup>4</sup> ) | (10 <sup>4</sup> ) | (10 <sup>5</sup> ) | (10 <sup>5</sup> ) |        |
|                    |              | $V_T$              | -25                | -20                | -21                | -17                | -19                | -23                | -23                |        |
| PS1                | 103          | 80                 | $\mu$              | 0.63               | 0.53               | 0.51               | 0.13               | 0.04               | 0.03               | 0.007  |
|                    |              | $(I_{on}:I_{off})$ | (10 <sup>6</sup> ) | (10 <sup>5</sup> ) | (10 <sup>5</sup> ) | (10 <sup>5</sup> ) | (10 <sup>5</sup> ) | (10 <sup>7</sup> ) | (10 <sup>7</sup> ) |        |
|                    |              | $V_T$              | -32                | -33                | -37                | -37                | -39                | -26                | -28                |        |
| PMMA2              | 108          | 60                 | $\mu$              | 0.27               | 0.24               | 0.23               | 0.11               | 0.09               | 0.03               | 0.004  |
|                    |              | $(I_{on}:I_{off})$ | (10 <sup>4</sup> ) | (10 <sup>4</sup> ) | (10 <sup>4</sup> ) | (10 <sup>4</sup> ) | (10 <sup>6</sup> ) | (10 <sup>6</sup> ) | (10 <sup>7</sup> ) |        |
|                    |              | $V_T$              | -34                | -33                | -34                | -35                | -29                | -29                | -28                |        |
| P2VP               | 103          | 70                 | $\mu$              | 0.08               | 0.08               | 0.08               | 0.03               | 0.02               | 0.003              | 0.0001 |
|                    |              | $(I_{on}:I_{off})$ | (10 <sup>5</sup> ) | (10 <sup>5</sup> ) | (10 <sup>5</sup> ) | (10 <sup>5</sup> ) | (10 <sup>6</sup> ) | (10 <sup>6</sup> ) | (10 <sup>3</sup> ) |        |
|                    |              | $V_T$              | -33                | -32                | -13                | -25                | -20                | -29                | -22                |        |

<sup>a</sup> Carrier mobilities calculated in saturation within the charge carrier concentration range of 3 – 4 × 10<sup>12</sup> cm<sup>-2</sup>. Standard deviations are typically < 10%; otherwise a mobility range is given. <sup>b</sup> From DSC data.

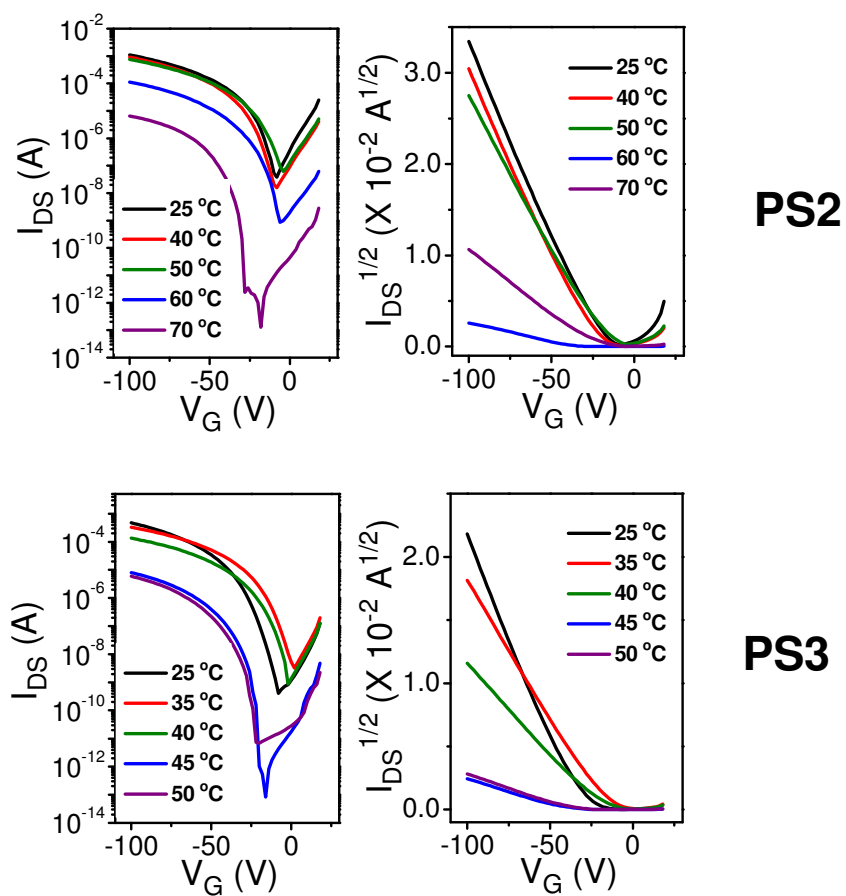

**Figure S1.** Transfer plots of pentacene TFTs fabricated on PS2 (24 nm) and PS3 (10 nm) gate dielectrics at the indicated  $T_{DS}$ .



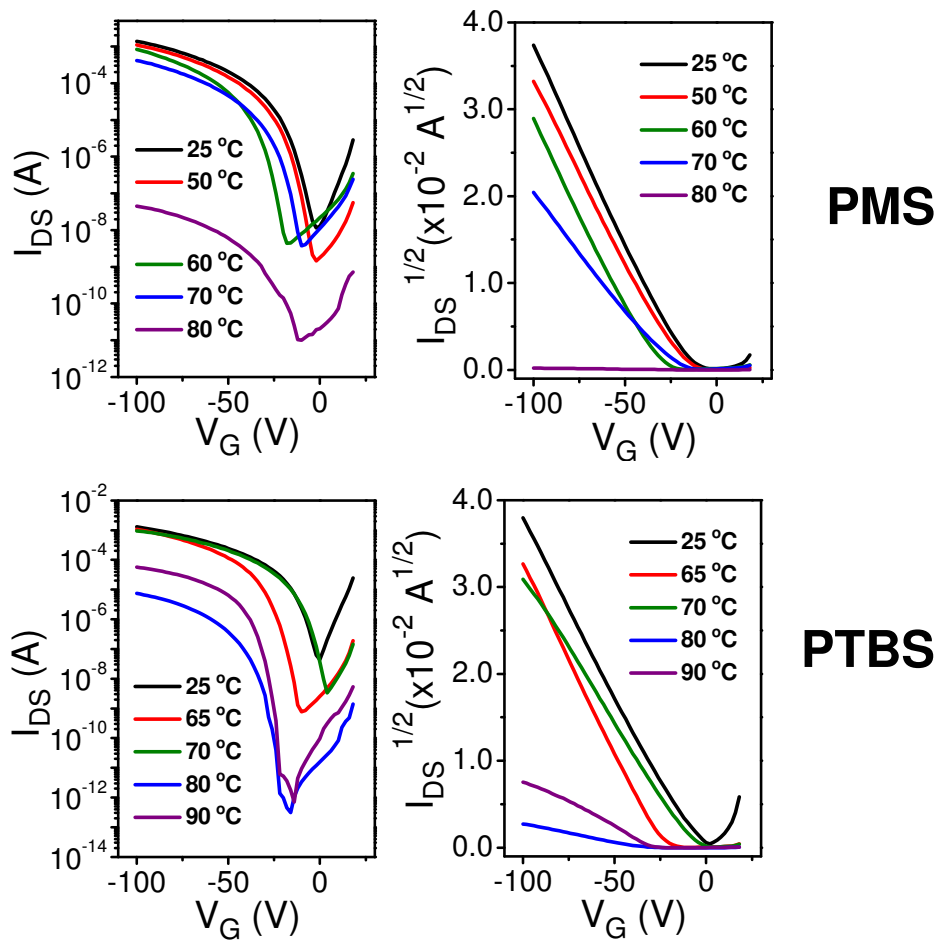

**Figure S2.** Transfer plots of pentacene TFTs fabricated on PMS (20 nm) and PTBS (30 nm) gate dielectrics at the indicated  $T_{DS}$ .

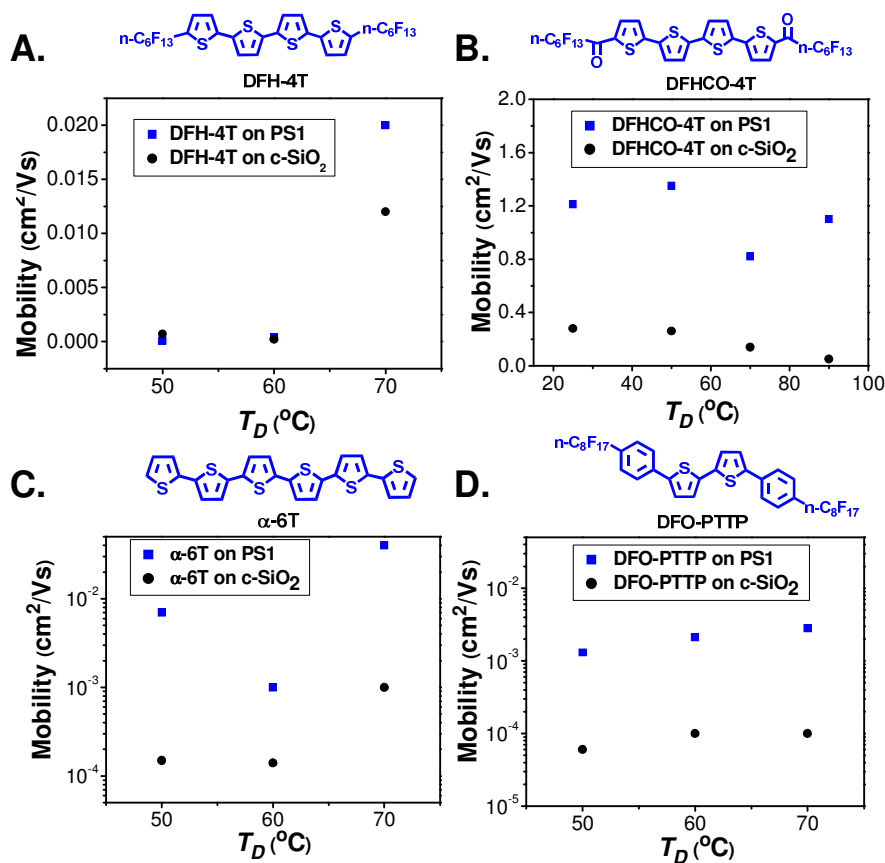

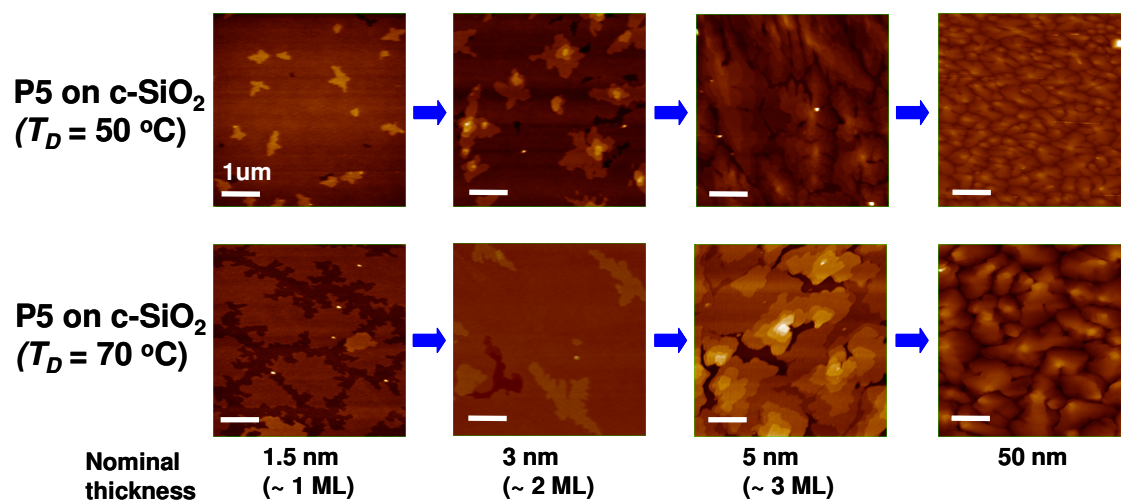

**Figure S5.** AFM images ( $5.0 \times 5.0\text{ }\mu\text{m}^2$ ) of vacuum-deposited pentacene films (1.5 – 50 nm) grown on c-SiO<sub>2</sub> gate dielectrics at the indicated  $T_D$ s. The scale bars indicate 1  $\mu\text{m}$ .

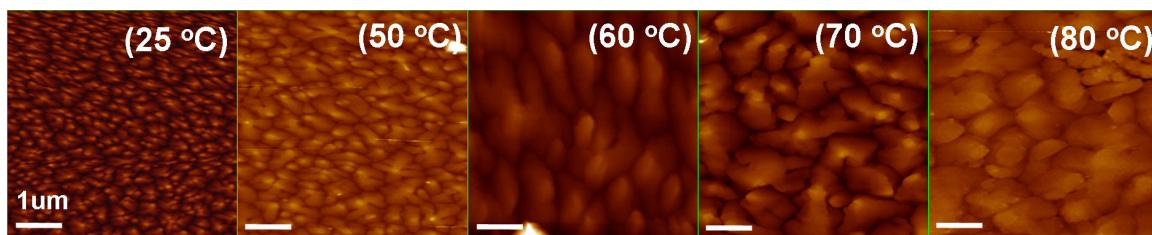

**Figure S6** AFM images ( $5.0 \times 5.0\text{ }\mu\text{m}^2$ ) of 50 nm thick pentacene films grown on c-SiO<sub>2</sub> gate dielectrics at the indicated  $T_D$ s. The scale bars indicate 1  $\mu\text{m}$ .

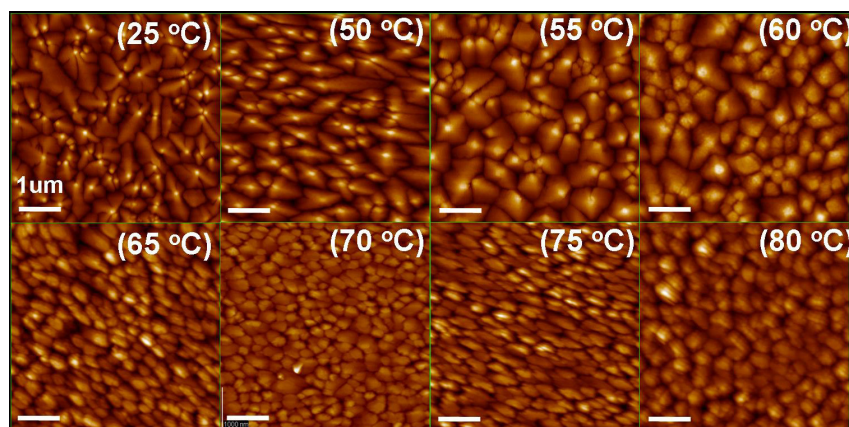

**Figure S7.** AFM images ( $5.0 \times 5.0\text{ }\mu\text{m}^2$ ) of 50 nm thick pentacene films grown on PS1 gate dielectrics at the indicated  $T_D$ s. The scale bars indicate 1  $\mu\text{m}$ .

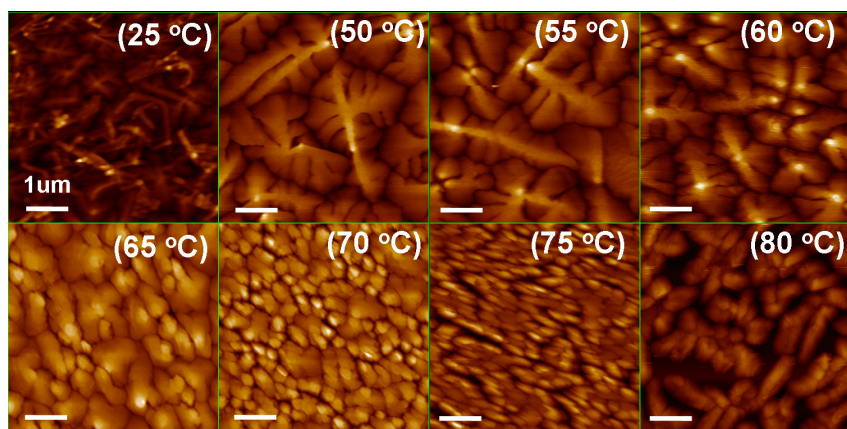

**Figure S8.** AFM images ( $5.0 \times 5.0 \mu\text{m}^2$ ) of 50 nm thick pentacene films grown on P2VP (12 nm) gate dielectrics at the indicated  $T_D$ s. The scale bars indicate 1  $\mu\text{m}$ .

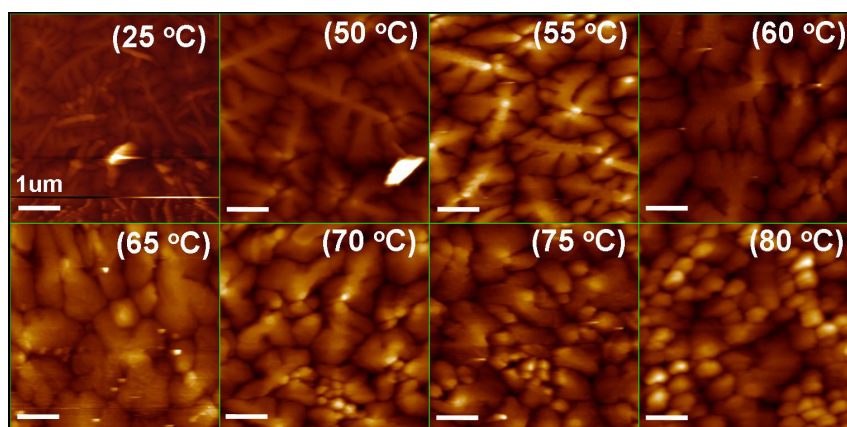

**Figure S9.** AFM images ( $5.0 \times 5.0 \mu\text{m}^2$ ) of 50 nm thick pentacene films grown on PMMA (10 nm) gate dielectrics at the indicated  $T_D$ s. The scale bars indicate 1  $\mu\text{m}$ .

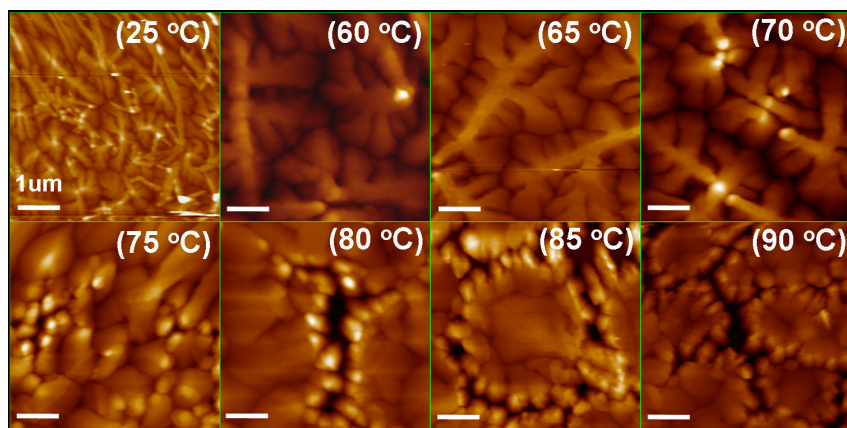

**Figure S10.** AFM images ( $5.0 \times 5.0 \mu\text{m}^2$ ) of 50 nm thick pentacene films grown on PTBS (30 nm) gate dielectrics at the indicated  $T_D$ s. The scale bars indicate 1  $\mu\text{m}$ .



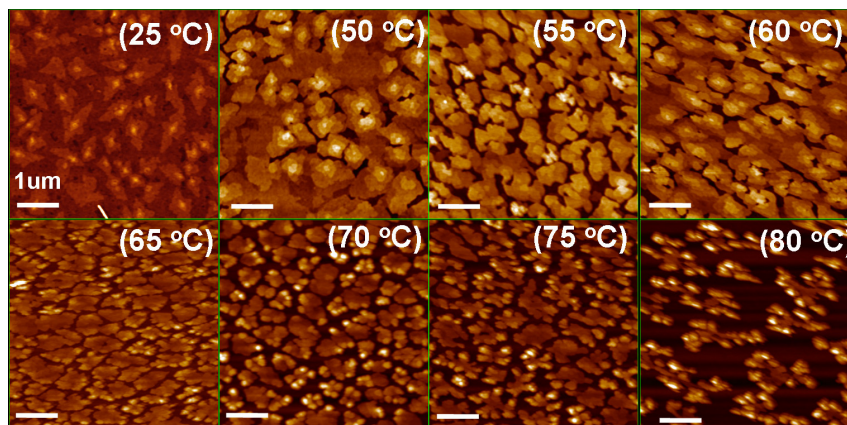

**Figure S11.** AFM images ( $5.0 \times 5.0 \mu\text{m}^2$ ) of 5 nm thick pentacene films grown on PS1 gate dielectrics at the indicated  $T_{DS}$ . The scale bars indicate 1  $\mu\text{m}$ .

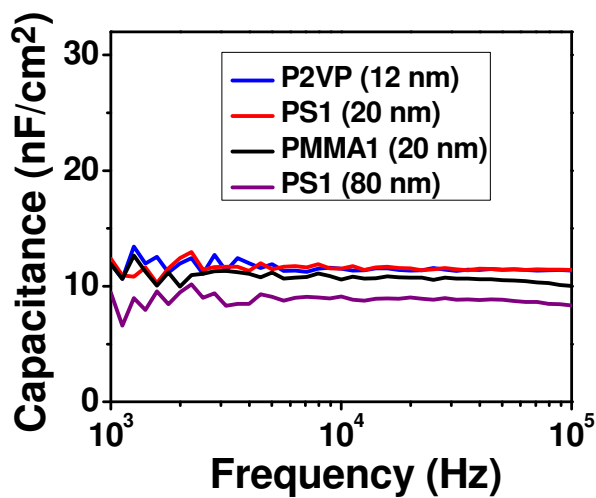

**Figure S12.** Capacitance-frequency plot for bilayer polymer/ $\text{SiO}_2$  dielectrics measured on MIS structure (AC driving voltage = 0.1 V, DC bias offset = -10 V).
